# Supplementary material
Source: HighWire-hosted journal article supplement (https://bjo.bmj.com/content/107/6/790)
Supplement: inline-supplementary-material-2 [file inline-supplementary-material-2.pdf]

## Appendix 2- List of specialists participating in the COVID-19 Uveitis Practice Pattern Study Group

| Name                                     | Affiliation                                                | Country    |
|------------------------------------------|------------------------------------------------------------|------------|
| Dra. Agustina C. Palacio                 |                                                            | Argentina  |
| Dr. Leonardo Pablo D'Alessandro          |                                                            | Argentina  |
| Marcelo Bursztyn, MD                     | Hospital Italiano de Buenos Aires                          | Argentina  |
| Peter McCluskey, MD                      | Save Sight Institute University of Sydney                  | Australia  |
| Justine Smith, MBBS, PhD, FRANZCO        | Flinders University, South Australia                       | Australia  |
| Lyndell Lim, MBBS, FRANZCO               | Centre for Eye Research Australia, University of Melbourne | Australia  |
| Josephine Richards, FCOphth, FRANZCO     |                                                            | Australia  |
| Elisa Cornish, MBBS, PhD                 | Sydney Eye Hospital                                        | Australia  |
| Zahedur Rahman, MD                       | Consultant Uveitis, Bangladesh Eye Hospital, and Institute | Bangladesh |
| Daniel Vitor Vasconcelos-Santos, MD, PhD | Universidade Federal de Minas Gerais                       | Brazil     |

|                                     |                                                                          |          |
|-------------------------------------|--------------------------------------------------------------------------|----------|
| Rubens Belfort jr, MD, PhD, MBA     | Vision Institute, Federal University of Sao Paulo                        | Brazil   |
| Heloisa Nascimento, MD, PhD         | Department of Uveitis - Federal University of São Paulo                  | Brazil   |
| Dr. Mario Fernández                 |                                                                          | Canada   |
| Larissa Derzko-Dzulynsky, MD, FRCSC | University of Toronto                                                    | Canada   |
| Enzo Castiglione, MD                | Universidad de Chile                                                     | Chile    |
| Gonzalo Duarte G., MD               | Ophthalmologist - Subspecialist in Uveitis and Inflammatory Eye diseases | Chile    |
| Paulina Liberman, MD                | Pontificia Universidad Católica de Chile                                 | Chile    |
| Alberto Castro, MD                  | Universidad Javeriana Cali                                               | Colombia |
| Kåre Clemmensen, MD                 | Aarhus University Hospital                                               | Denmark  |
| Dr. Terese Kamal Gerges             | Al Watany Eye Hospital Cairo Egypt                                       | Egypt    |

|                                  |                                                                                                                                                               |           |
|----------------------------------|---------------------------------------------------------------------------------------------------------------------------------------------------------------|-----------|
| John H. Kempen, MD, PhD          | Massachusetts Eye and Ear/Harvard Medical School;<br>Sight for Souls; MyungSung Christian Medical<br>Center Eye Unit; Addis Ababa University<br>Ophthalmology | Ethiopia  |
| Bouleau                          |                                                                                                                                                               | France    |
| Bahram Bodaghi, MD, PhD,<br>FEBO | Sorbonne University, Paris, France                                                                                                                            | France    |
| Prof. Dr. med. Stephan Thurau    | Eye Hospital Ludwig-Maximilians-University,<br>Munich, Germany                                                                                                | Germany   |
| Carsten Heinz, MD, FEBO          | Deptment of Ophthalmology at St- Franziskus-<br>Hospital Münster, Germany                                                                                     | Germany   |
| Timothy Lai, MD, FRCOphth        | The Chinese University of Hong Kong                                                                                                                           | Hong Kong |

|                                     |                                                                                                                                                         |           |
|-------------------------------------|---------------------------------------------------------------------------------------------------------------------------------------------------------|-----------|
| Kenneth K Li, MBChB, FRCS, FRCOphth | United Christian Hospital                                                                                                                               | Hong Kong |
| Timothy Y Y Lai, MD, MBBS, FRCOphth | The Chinese University of Hong Kong                                                                                                                     | Hong Kong |
| Zsuzsanna Gehl, MD                  | Semmelweis University, Ophthalmology, Budapest                                                                                                          | Hungary   |
| Kalpana Babu, MBBS                  | Department of uveitis and ocular inflammation;<br>Prabha eye clinic and research centre, Vittala<br>International Institute of ophthalmology, Bangalore | India     |
| Dipankar Das, MD                    | Sri Sankaradeva Nethralaya, Guwahati, Assam                                                                                                             | India     |

|                                  |                                                                                                |           |
|----------------------------------|------------------------------------------------------------------------------------------------|-----------|
| Jyotirmay Biswas, MBBS, MS       | Director of Uveitis and Ophthalmic pathology, sankara Nethralaya, Chennai                      | India     |
| Aniruddha Agarwal, MD            | Post Graduate Institute of Medical Education and Research                                      | India     |
| Padmamalini Mahendradas, MBBS    | Head of the department of uveitis and ocular immunology, Narayana Nethralaya, Bangalore, India | India     |
| Sudha K Ganesh, MBBS, MS         | Medical Research Foundation Chennai India                                                      | India     |
| Ankush Kawali, MD                | Narayana Nethralaya                                                                            | India     |
| Ratna Sitompul, MD, PhD          |                                                                                                | Indonesia |
| Nur Alim Basyir Hutasuhut, SpM   |                                                                                                | Indonesia |
| Dr I Gusti Ayu Made Juliari, SpM |                                                                                                | Indonesia |

|                              |                                                                           |           |
|------------------------------|---------------------------------------------------------------------------|-----------|
| Rifna Lutfiamida, MD         | Klinik Mata Nusantara                                                     | Indonesia |
| Susi Heryati, MD             | Infection and immunology                                                  | Indonesia |
| Arief Mustaram, MD           |                                                                           | Indonesia |
| Rina La Distia Nora, MD, PhD | Ophthalmology Department Medical Faculty Universitas Indonesia            | Indonesia |
| Kukuh Prasetyo, MD           | JEC Anwari @Purwokerto                                                    | Indonesia |
| Hasnah                       | Indonesian Ocular Infection Immunology Society                            | Indonesia |
| Yulia Aziza, MD              | Department of Ophthalmology, Faculty of Medicine, University of Indonesia | Indonesia |

|                               |                                                                                   |        |
|-------------------------------|-----------------------------------------------------------------------------------|--------|
| Dr. Vicktoria Vishnevskia Dai | The Goldschleger eye institute, Sheba Medical Center, Tel-Aviv University, Israel | Israel |
| Shsul Sar, MD                 | Carmel hospital, Haifa, Israel                                                    | Israel |
| Shiri Shulman, MD             | Tel-aviv medical center, Tel-aviv                                                 | Israel |
| Raz Gepstein, MD              | Meir medical center                                                               | Israel |
| Shaul Sar, MD                 | Carmel hospital, Haifa                                                            | Israel |
| Tamar Blum Hareuveni, MD      |                                                                                   | Israel |
| Pia Allegri, MD               | Rapallo (Genova) Uveitis Referral Center                                          | Italy  |
| Luca Cimino, MD               | Ocular Immunology Unit Azienda USL-IRCCS, Reggio Emilia                           | Italy  |

|                            |                                                                                               |        |
|----------------------------|-----------------------------------------------------------------------------------------------|--------|
| Maria Pia Paroli, MD       | Università La Sapienza Roma                                                                   | Italy  |
| Massimo Accorinti, MD, PhD | Ocular Immunovirology Service, Department of Sense Organs, Sapienza University of Rome        | Italy  |
| Sentaro Kusahara, MD       | Division of Ophthalmology, Department of Surgery, Kobe University Graduate School of Medicine | Japan  |
| Dr. Shigeeko Yashiro       | National Center for Global Health and Medicine                                                | Japan  |
| Rashel Cheja-Kalb, MD      | Asociación para Evitar la Ceguera en México I.A.P., Mexico City                               | Mexico |



|                                |                                                                                                                             |        |
|--------------------------------|-----------------------------------------------------------------------------------------------------------------------------|--------|
| Dra. Luz-Elena Concha-del-Rio  | Asociacion Para Evitar la Ceguera en Mexico I. A. P., Mexico City                                                           | Mexico |
| Dr. Ortega-Larrocea G          | Hospital Medica Sur                                                                                                         | Mexico |
| Dra. Stephanie Voorduin-Ramos  | Head of the Ocular Inflammatory Diseases Department, Fundacion Hospital Nuestra Señora de la Luz, Mexico City               | Mexico |
| Alejandro Rodriguez-Garcia, MD | Tecnologico de Monterrey, School of Medicine and Health Sciences, Institute of Ophthalmology and Visual Sciences, Monterrey | Mexico |

|                                         |                                                                                                            |             |
|-----------------------------------------|------------------------------------------------------------------------------------------------------------|-------------|
| May Zun Aung Win, MBBS                  | Lecture/Consultant Ophthalmologist, Uveitis Service, University of Medicine 1, Yangon Eye Hospital, Yangon | Myanmar     |
| Viera Kalinina Ayuso, MD, PhD           | UMC Utrecht                                                                                                | Netherlands |
| Bety Yañez, MD                          | Hospital Nacional Dos de Mayo                                                                              | Peru        |
| Neil Onghanseng, MD                     | Makati Medical Center, Makati                                                                              | Philippines |
| Mayjane Joan Tumulak, MD                | Philippine Ocular Inflammation Society                                                                     | Philippines |
| Jordan Famadico, MD                     |                                                                                                            | Philippines |
| Fernandino A. Fontanilla, MD, MBA, FPAO | Asian Hospital and Medical Center                                                                          | Philippines |
| Vicente Victor Ocampo Jr., MD           |                                                                                                            | Philippines |

|                                           |                                                                                                                                                 |                       |
|-------------------------------------------|-------------------------------------------------------------------------------------------------------------------------------------------------|-----------------------|
| Joanna Przeździecka-Dołyk,<br>MD, OD, PhD | Department of Optics and Photonics, Wrocław<br>University of Science and Technology, Department<br>of Ophthalmology, Wrocław Medical University | Poland                |
| Min Kim, MD                               | Yonsei University College of Medicine, Gangnam<br>Severance Hospital                                                                            | Republic of<br>Korea  |
| Denisova Ekaterina                        | Helmholtz research institute of eye diseases                                                                                                    | Russian<br>Federation |
| Aleksandra Radosavljevic, MD,<br>PhD      | School of Medicine, University of Belgrade,<br>University Eye Hospital, Clinical Center of Serbia                                               | Serbia                |
| Yuen Yew Sen, MBBS, MMed,<br>FAMS         | National University Hospital                                                                                                                    | Singapore             |

|                                |                                                                                                      |              |
|--------------------------------|------------------------------------------------------------------------------------------------------|--------------|
| Derrick Smit, FCOphth, PhD     |                                                                                                      | South Africa |
| Ji Hun Song, MD, PhD           | Ajou University School of Medicine                                                                   | South Korea  |
| Dr. MJ Capella                 | Centro de Oftalmología Barraquer                                                                     | Spain        |
| Dr. I Rodriguez-Pintó          | Hospital Universitari Mutua de Terrassa                                                              | Spain        |
| Alex Fonollosa, MD             | Department of Ophthalmology, BioCruces Bizkaia Health Research Institute, Cruces University Hospital | Spain        |
| Carmen Garcia-Saenz, MD        | Hospital Universitario Fundación Alcorcón                                                            | Spain        |
| Jódar-Márquez M, MD, PHD, FEBO | Hospital Regional de Málaga                                                                          | Spain        |
| Carlos Fernandez-Cid, PhD      |                                                                                                      | Spain        |

|                               |                                                              |             |
|-------------------------------|--------------------------------------------------------------|-------------|
| Ana Blanco Esteban, MD        |                                                              | Spain       |
| Lucía Martínez-Costa, MD, PhD |                                                              | Spain       |
| Dr. Juan Luis Sánchez Sevilla | Marina Baixa Hospital, Alicante                              | Spain       |
| Dr. Victor Menezo             | Institut Catala de Retina                                    | Spain       |
| Ester Carreno, MD             | Hospital Universitario Fundacion Jimenez Diaz                | Spain       |
| Peter Trittibach MD, FEBO     | Augenarztpraxis Dr. Trittibach                               | Switzerland |
| Prof. Christoph Tappeiner, MD | Department of Ophthalmology, Inselspital, University of Bern | Switzerland |
| Prof. Yan Guex-Crosier        | Jules-Gonin Eye Hospital, FAA, University of Lausanne        | Switzerland |
| Jerry Chien-Chieh Huang, MD   | Chang Gung Memorial Hospital                                 | Taiwan      |

|                               |                                                                                             |          |
|-------------------------------|---------------------------------------------------------------------------------------------|----------|
| Yih-Shiou Hwang, MD, PhD      | Chang Gung Memorial Hospital, Linkou and Taipei                                             | Taiwan   |
| Wantanee Sittivarakul, MD     | Prince of Songkla University Thailand                                                       | Thailand |
| Ilhem                         | department of Ophthalmology, Charles Nicolle University Hospital of Tunis                   | Tunisia  |
| Moncef Khairallah, MD         | Department of Ophthalmology, Fattouma Bourguiba University Hospital, University of Monastir | Tunisia  |
| Murat Hasanreisoglu, MD, FEBO | Koc University, School of Medicine, Ophthalmology Department                                | Turkey   |

|                                        |                                                                                    |                          |
|----------------------------------------|------------------------------------------------------------------------------------|--------------------------|
| Pinar Ozdal, MD                        | University of Health Sciences, Ankara Ulucanlar Eye Training and Research Hospital | Turkey                   |
| Piergiorgio Neri, MD, PhD              | Cleveland Clinic Abu Dhabi                                                         | United Arab Emirates     |
| Philip I. Murray, FRCP, FRCS, FRCOphth | University of Birmingham; Birmingham and Midland Eye Centre                        | United Kingdom           |
| Narciss Okhravi, MBBS, FRCOphth        | Moorfields Eye Hospital                                                            | United Kingdom           |
| Carlos Pavesio, MD, FRCOphth           | Moorfields Eye Hospital                                                            | United Kingdom           |
| Phoebe Lin, MD, PhD                    | Casey Eye Institute                                                                | United States of America |
| Parisa Emami, MD, MPH                  | University of California Davis Eye Center, California                              | United States of America |

|                             |                                                                                            |                          |
|-----------------------------|--------------------------------------------------------------------------------------------|--------------------------|
| Lynn M Hassman, MD, PhD     | Washington University in St. Louis                                                         | United States of America |
| Jordan D. Deaner, MD        | Duke University Eye Center                                                                 | United States of America |
| Alla Goldberg, MD           | Thomas Eye Group                                                                           | United States of America |
| Kareem Moussa, MD           | The Permanente Medical Group                                                               | United States of America |
| Akshay S. Thomas, MD        | Tennessee Retina                                                                           | United States of America |
| Kristin Biggee, MD          | NW Permanente                                                                              | United States of America |
| Edmund Tsui, MD             | UCLA Stein Eye Institute, David Geffen School of Medicine at UCLA, Los Angeles, California | United States of America |
| Richard Alan Lewis, MD, MS  | Baylor College of Medicine                                                                 | United States of America |
| Kashyap Kansupada, MD, FACS | Charlotte Eye Ear Nose and Throat Associates                                               | United States of America |
| Harpal S. Sandhu, MD        | University of Louisville                                                                   | United States of America |



|                          |                                                                                  |                          |
|--------------------------|----------------------------------------------------------------------------------|--------------------------|
| Tayyeba K. Ali, MD       | California Pacific Medical Center                                                | United States of America |
| Debra A. Goldstein, MD   | Northwestern university, Department of ophthalmology                             | United States of America |
| Nirali Bhatt, MD         | Scheie Eye Institute/university of Pennsylvania                                  | United States of America |
| Christopher R. Henry, MD | Retina Consultants of Texas                                                      | United States of America |
| Ann-Marie Lobo-Chan, MD  | University of Illinois                                                           | United States of America |
| Laura J Kopplin, MD, PhD | University of Wisconsin-Madison, Department of Ophthalmology and Visual Sciences | United States of America |
| Arthi Venkat, MD, MSc    | Retina Group of Washington                                                       | United States of America |
| Thellea Leveque, MD, MPH | university of Washington                                                         | United States of America |
| Wendy M Smith, MD        | Mayo Clinic                                                                      | United States of America |

|                            |                                                                           |                          |
|----------------------------|---------------------------------------------------------------------------|--------------------------|
| Ying Qian, MD              | Kaiser Permanente Oakland Medical Center                                  | United States of America |
| Karen R. Armbrust, MD, PhD | Minneapolis Veterans Affairs Health Care System                           | United States of America |
| Anjum Koreishi, MD         | Northwestern University                                                   | United States of America |
| Ana M. Suelves, MD, PhD    | The Ohio State University                                                 | United States of America |
| Jennifer E Thorne, MD, PhD | Wilmer Eye Institute                                                      | United States of America |
| Sapna Gangaputra, MD       | Vanderbilt Eye Institute                                                  | United States of America |
| Brian K. Do, MD            | The Retina Group of Washington / Georgetown University School of Medicine | United States of America |
| Pauline Merrill, MD        | Rush University, Chicago IL                                               | United States of America |
| Michael E Zegans, MD       | Geisel School of Medicine at Dartmouth                                    | United States of America |

|                              |                                                                    |                          |
|------------------------------|--------------------------------------------------------------------|--------------------------|
| Roberto Diaz-Rohena, MD      | UTHSCSA                                                            | United States of America |
| John Nguyen, MD              | West Virginia University                                           | United States of America |
| Mei Zhou, MD                 | Wheaton Eye Clinic                                                 | United States of America |
| Shilpa Kodati, MD            | National Eye Institute, National Institutes of Health              | United States of America |
| Henry Lin, MD                | Northwest Permanente                                               | United States of America |
| Kathryn L. Pepple, MD, PhD   | University of Washington, Department of Ophthalmology, Seattle, WA | United States of America |
| Grace Levy-Clarke, MD        | Tampa Bay Uveitis Center                                           | United States of America |
| Parvathy Pillai, MD          | LifeBridge Health (Sinai Hospital of Baltimore)                    | United States of America |
| Marie Helene Errera, MD, PhD | UPMC Pittsburgh, PA and University Pittsburgh Medical School       | United States of America |

|                              |                                                         |                          |
|------------------------------|---------------------------------------------------------|--------------------------|
| Pooja Bhat, MD               | University of Illinois at Chicago                       | United States of America |
| Armando L. Oliver, MD        | University of Puerto Rico School of Medicine            | United States of America |
| J. Fernando Arevalo, MD, PhD | Johns Hopkins University-Wilmer Eye Institute           | United States of America |
| Janet Davis, MD              | Bascom Palmer Eye Institute                             | United States of America |
| Caroline L Minkus, MD        | University of Minnesota                                 | United States of America |
| Lana Rifkin, MD              | Ophthalmic Consultants of Boston/New England Eye Center | United States of America |
| Paul Yang, MD, PhD           | Casey Eye Institute, OHSU                               | United States of America |
| Monica Dalal, MD             | George Washington Medical Faculty Associates            | United States of America |
| Annabelle A. Okada, MD       | Kyorin University School of Medicine, Tokyo             | Japan                    |

|                     |                   |  |
|---------------------|-------------------|--|
| Prof Dr Yonca Akova | Bayindir hospital |  |
| Dr. Gaurav Chandra  |                   |  |
| Diana Peiteado, PhD |                   |  |
